# Supplementary material for: Homogalacturonan Pectins Tuned as an Effect of Susceptible rbohD, Col-0-Reactions, and Resistance rbohF-, rbohD/F-Reactions to TuMV
Source: MDPI journal article supplement (doi:10.3390/ijms25105256), 2024-05-11
Supplement: s1 [file ijms-2970819-supplementary.pdf › ijms-2970819-supplementary.pdf]

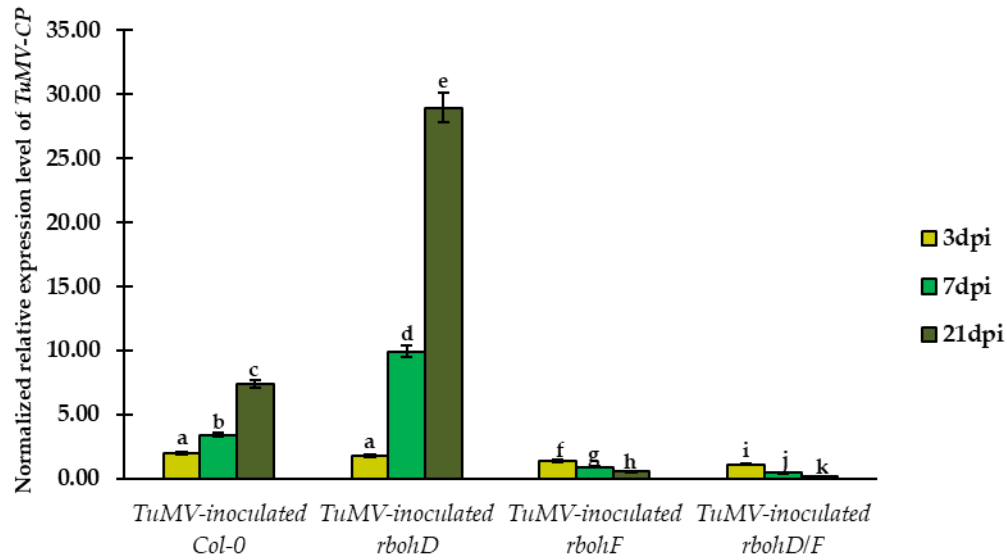

**Figure S1.** Validation of TuMV levels in Col-0, rbohD, rbohF, and rbohD/F plants at 3, 7, and 21 dpi based on normalized relative expression of *TuMV-CP*. Normalized relative expression of *TuMV-CP* was calculated based on the mean expression of *AtEflα* and *AtF-Box* reference genes. Statistical significance of differences was assessed at the  $p < 0.05$  level using ANOVA with post hoc Tukey's HSD and is indicated by different letters above the bars.

**Table S1.** Primer sequences for RT-qPCR analyses.

| Genes               | Forward Primer                                | Reverse Primer                                | Concentration in Reaction (μM) |
|---------------------|-----------------------------------------------|-----------------------------------------------|--------------------------------|
| <i>Investigated</i> |                                               |                                               |                                |
| <i>TuMV-CP</i>      | 5'-<br>CCGGAATTCATGTTTGG<br>TGYATIGAIAAYGG-3' | 5'-<br>CGCGGATCCGCGYYTTCATYTGIRIHWKI<br>GC-3' | 0.5                            |
| <i>AtPME3</i>       | 5'-<br>CTCCGCCATTACCAACC<br>A -3'             | 5'- CGTGTATCTGCCCTTCAA -3                     | 0.5                            |
| <i>AtPME17</i>      | 5'-<br>GAGAGGTGATGGTATAG<br>GGA -3'           | 5'- GAGCTGTGATTGTGTGGTC -3'                   | 0.5                            |
| <i>AtPME12</i>      | 5'-<br>CTAGTCAAGACAGCAAC<br>CAA -3'           | 5'- AGGCTCTGCTTAGCATCA -3'                    | 0.5                            |
| <i>AtPME13</i>      | 5'-<br>TCCGTACTCTTTCGTCAT<br>ACTC -3'         | 5'- CTGATTTTATGCGGCTTGA -3'                   | 0,5                            |
| <i>AtGAUT1</i>      | 5'-<br>AGTTTCCACAGATTTCGA<br>CAAG -3'         | 5'- CCATAAGCCCATCCACAAG -3'                   | 0.5                            |
| <i>AtGAUT7</i>      | 5'-<br>GGTTTGAATGTCGTTGAT<br>CTTG -3'         | 5'- ACTCATCTCCACTACTCATCTC -3'                | 0.5                            |

| Genes            | Forward Primer                       | Reverse Primer              | Concentration in Reaction (μM) |
|------------------|--------------------------------------|-----------------------------|--------------------------------|
| <i>Reference</i> |                                      |                             |                                |
| <i>AtEF1a</i>    | 5'-<br>CACCACCTGGAGGTTTGG<br>AGG -3' | 3'- TGGAGTATTTGGGGGTGGT -5' | 0.5                            |
| <i>AtF-Box</i>   | 5'-<br>GCTTGACACGCCATAT<br>CAAT-3'   | 3'-TGGATTTTACCACCTTCCGCA-5' | 0.5                            |

**Table S2.** Conditions of the RT-qPCR for the reference genes (\*).

| Program                   | Parameters                                             |
|---------------------------|--------------------------------------------------------|
| Preliminary denaturation  | 95 °C for 10 min                                       |
| Amplification (40 cycles) | 95 °C for 15 s<br>58-61°C for 30 s<br>72 °C for 30 s * |
| Melting curve             | 65–95 °C; 0.1 °C/s                                     |

\* Fluorescence signal reading was taken at the final stage

**Table S3.** Predictions of protein localization according different predictors connected with SUBA5 prediction and integrated in database PubMed MS/MS results

| Protein name   | Results of bionforamtic subcellular localization predictions with predictors allocated in SUBA5                                                                                                                                                                                                                                                                                                                                                                                                        | SUBAcon                 | MS/MS data                                                                                                                                                       |
|----------------|--------------------------------------------------------------------------------------------------------------------------------------------------------------------------------------------------------------------------------------------------------------------------------------------------------------------------------------------------------------------------------------------------------------------------------------------------------------------------------------------------------|-------------------------|------------------------------------------------------------------------------------------------------------------------------------------------------------------|
| <b>AtPME3</b>  | Golgi apparatus (predictors: PredSL, PProwler)<br>Plastid (predictors: EpiLoc, PCLR)<br>Vacuole (predictor: YLoc)<br>Mitochondrion (predictors: iPSORT, SLPFA and SubLoc)<br>Extracellular/cell wall (predictors: PredSL, PProwler, Plant-mPloc, TargetP)<br>Nucleus (predictors: BaCellLo, SLP-Local)<br>endoplasmic reticulum (predictors: TargetP, PredSL, PProwler)<br>cytosol (Predictors: AdaBoost)<br>plasma membrane (predictors: WoLF PSORT)                                                  | Extracellular/cell wall | Extracellular/cell wall,<br>Golgi apparatus/Trans Golgi Network,<br>Multivesicular body<br>Mitochondrion,<br>Nucleus,<br>Plasma membrane<br>Plastid,<br>Vacuole, |
| <b>AtPMEI2</b> | Golgi apparatus (predictors: Predotar, PredSL, PProwler, SLPFA, SLP-Local, TargetP)<br>Plastid (predictors: PCLR, WoLF PSORT, ChloroP)<br>Mitochondrion (predictors: iPSORT, Mitoprot 2, SubLoc)<br>Extracellular/ cell wall (predictors: Predotar, PredSL, PProwler, SLPFA, SLP-Local, TargetP, YLoc, MultiLoc)<br>Nucleus (predictors: BaCellLo)<br>Endoplasmic reticulum (predictors: TargetP, Predotar, PredSL, PProwler, SLPFA, SLP-Local)<br>Plasma membrane (predictors: AdaBoost, Plant-mPloc) | Extracellular/cell wall | Nucleus                                                                                                                                                          |
| <b>AtPMEI3</b> | Golgi apparatus (predictors: Predotar, PredSL, PProwler, iPSORT, SLP-Local, TargetP)<br>Plastid (predictors: AdaBoost, WoLF PSORT)<br>Nucleus (predictors: BaCellLo)<br>Extracellular/ cell wall (predictors: iPSORT, SLP-Local, TargetP, YLoc, Predotar, PredSL, PProwler)<br>Endoplasmic reticulum (predictors: TargetP, Predotar, PredSL, PProwler, iPSORT, MultiLoc, SLP-Local)<br>Plasma membrane (predictors: Plant-mPloc)<br>Mitochondrion (predictors: SLPFA, SubLoc)                          | Extracellular/cell wall | Extracellular/cell wall                                                                                                                                          |
| <b>AtGAUT1</b> | Golgi apparatus (predictors: EpiLoc, MultiLoc, YLoc)<br>Plastid (predictors: Plant-mPloc, BaCellLo)<br>Mitochondrion (predictors: MitoPred, PredSL, SLPFA, SubLoc, iPSORT, Predotar, PProwler, SLP-Local, TargetP)<br>Cytosol (predictors: WoLF PSORT)<br>Plasma membrane (predictors: AdaBoost)                                                                                                                                                                                                       | Golgi apparatus         | Extracellular/cell wall,<br>Golgi apparatus/Trans Golgi Network<br>Multivesicular body<br>Plasma membrane<br>Plastid<br>Vacuole                                  |
